# Supplementary material for: Genetic evidence for causal relationships between age at natural menopause and the risk of aging-associated adverse health outcomes
Source: bioRxiv or medRxiv preprint supplement (doi:10.1101/2022.01.26.22269835), 2022-07-04

# Supplementary Materials

Genetic evidence for causal relationships between age at natural menopause and the risk of aging-associated adverse health outcomes

Joanna Lankester, PhD<sup>1,2</sup>, Jin Li, PhD<sup>1,3</sup>, Elias Levy Itshak Salfati, PhD<sup>4</sup>, Marcia L. Stefanick Ph.D<sup>1,5</sup>, Kei Hang Katie Chan, MPH, PhD<sup>6,7,8</sup>, Simin Liu, MD, ScD<sup>8,9</sup>, Carolyn J. Crandall, MD, MS<sup>10</sup>, Shoa L. Clarke, MD, PhD\*<sup>1,2</sup>, Themistocles L. Assimes, MD, PhD\*<sup>1,2</sup>

<sup>1</sup>Department of Medicine, Stanford University School of Medicine

<sup>2</sup>VA Palo Alto Health Care System, Palo Alto, CA

<sup>3</sup>ThermoFisher Scientific

<sup>4</sup>The Scripps Research Institute

<sup>5</sup>Department of Obstetrics and Gynecology, Stanford University School of Medicine

<sup>6</sup>Departments of Biomedical Sciences and Electrical Engineering in the City University of Hong Kong

<sup>7</sup>Center for Global Cardiometabolic Health, Brown University

<sup>8</sup>Department of Epidemiology, School of Public Health, Brown University

<sup>9</sup>Department of Medicine, Alpert School of Medicine, Brown University

<sup>10</sup>Department of Medicine, David Geffen School of Medicine at University of California, Los Angeles

## Supplemental Methods

### Item 1.

Table. External datasets acquired from NIH database of Genotypes and Phenotypes (dbGaP) and from the European Genome-Phenome Archive (EGA) for two-sample mendelian randomization after restricting datasets to post-menopausal women

| Abbreviation in figure       | Full name                                                                                    | Access number         | Phenotype                      | Reference (PMID)                       |
|------------------------------|----------------------------------------------------------------------------------------------|-----------------------|--------------------------------|----------------------------------------|
| ARIC                         | The Atherosclerosis Risk in Communities (ARIC) Study                                         | phs000280             | coronary heart disease, stroke | 2646917                                |
| CHS                          | Cardiovascular Health Study                                                                  | phs000287             | coronary heart disease, stroke | 1669507                                |
| E2C2                         | Epidemiology of Endometrial Cancer Consortium                                                | phs000893             | endometrial                    | 19132539, 24096698                     |
| EAGLE+ATBC+PLCO+C SP-II GWAS | A Genome-Wide Association Study of Lung Cancer Risk                                          | phs000336             | lung cancer                    | 19836008                               |
| FHS                          | Framingham Heart Study                                                                       | phs000007             | coronary heart disease, stroke | 14819398, 1208363, 17372189            |
| High density SNP analysis    | High Density SNP Association Analysis of Lung Cancer                                         | phs000753             | lung cancer                    | 18385676                               |
| Kaiser                       | Kaiser Permanente Research Program on Genes, Environment, and Health (RPGEH)                 | phs000788 (phs000674) | osteoporosis                   | 21565264, 21903159, 26092718, 26092716 |
| MESA                         | Multi-Ethnic Study of Atherosclerosis                                                        | phs000209             | coronary heart disease, stroke | 12397006                               |
| NCI GWAS                     | National Cancer Institute (NCI) Genome Wide Association Study (GWAS) of Lung Cancer in Never | phs000634             | lung cancer                    | 31009812                               |
| NHS                          | Nurses Health Study 2                                                                        | phs000147             | breast cancer                  | 17529973, 22037553                     |
| WTCCC2                       | Wellcome Trust Case Control Consortium 2                                                     | EGAD00010000264       | stroke                         | 24436234                               |

### Item 2.

#### Definition of ANM

Women’s Health Initiative (WHI): Age of natural menopause was derived by WHI from questions related to menopause status and provided via the MENO variable which we used as the ANM in our analyses. Questions related to menopause status included “How old were you when you last had any menstrual bleeding?”, “When was the last time you had any menstrual bleeding or spotting?”, “How old were you when you first had symptoms such as hot flashes or night sweats?”, “Did you ever have a hysterectomy?”, “How old were you when you had your hysterectomy”, “Did you ever have an operation to have one or both of your ovaries taken out?”, and “How old were you when you had your last operation to remove an ovary?” For women with history of bilateral oophorectomy before menopausal symptoms began, their ANM is not available. For women with history of hysterectomy in the absence of bilateral oophorectomy before menopausal symptoms began, their

ANM was estimated from the age of their menopausal symptoms instead of last menstrual bleeding. For the remaining women, their ANM was derived from the age of last menstrual bleeding and defined as the age of the participant after 1 year of amenorrhea.

UK Biobank (UKB): Women who indicated they had undergone menopause were asked: “How old were you when your periods stopped?” Their response was recorded in field 3581 labeled “age at menopause”. Given the ambiguity of the question (i.e., they were not asked for age at last menstrual period), we took this field at face value. This field was collected from women of a variety of ages in the UK Biobank and therefore could have been many years post-menopause. To mitigate against recall error, we used a two-year buffer for definition of both surgical causes of period cessation and clinical outcome cases. Thus, women who had undergone bilateral oophorectomy (field 3882) at or before the age of field 3581 + 2 years were excluded. UKB did not collect data on other menopausal symptoms, so women who had a hysterectomy prior to menopause did not have an available age of menopause. Those with an age of hysterectomy (field 2824) at or before the age of field 3581 + 2 years were also excluded.

### Item 3.

Phenotypic definitions; unique identifiers for each variable used from Women's Health Initiative and UK Biobank. Retrieval from (<https://sp.whi.org/researchers/data/SitePages/SAS%20Variables.aspx>) and (<https://biobank.ctsu.ox.ac.uk/crystal/search.cgi>).

### Item 3a.

Table. Definition of covariates in Women's Health Initiative data. (Documented variable order may differ from question number in form, given that some questions have subsections.)

| Covariate                                              | Variable ID | Units                       | Form                                      | Variable Order | Description                                                                                                                                                                                                                          |
|--------------------------------------------------------|-------------|-----------------------------|-------------------------------------------|----------------|--------------------------------------------------------------------------------------------------------------------------------------------------------------------------------------------------------------------------------------|
| age at menopause                                       | MENO        | years                       | 31                                        | 63             | Age at which participant went through menopause. Computed using Form 31, questions 5, 6.1, 10, 10.1; Form 2, questions 7, 18, 18.2; Form 43 (age first used HRT).                                                                    |
| age at enrollment                                      | AGE         | years                       | 2                                         | 6              | Derived from date of birth and date of enrollment                                                                                                                                                                                    |
| body mass index                                        | BMI         | kg/m <sup>2</sup>           | 80                                        | 20             | Derived from measured height and weight at enrollment                                                                                                                                                                                |
| systolic blood pressure                                | SYST        | mmHg                        | 80                                        | 7              | Measured at baseline (question 6.1 and 6.2), averaged from two readings                                                                                                                                                              |
| education                                              | EDUC        | numeric category            | 20                                        | 3              | ordinal variable with 11 categories (question 6)                                                                                                                                                                                     |
| family income                                          | INCOME      | numeric category            | 20                                        | 25             | ordinal variable with 9 categories (question 11)                                                                                                                                                                                     |
| alcohol                                                | F60ALCWK    | number of servings per week | 60                                        | 32             | self-reported from food frequency questionnaire                                                                                                                                                                                      |
| physical activity                                      | TEXPWK      | MET-hours/week              | 143                                       | 210            | Computed from form 143, questions 6, 6.1, 6.2, 7.1-7.6                                                                                                                                                                               |
| dietary vitamin D                                      | F60VITD     | mcg/day                     | 60                                        | 56             | self-reported from food frequency questionnaire                                                                                                                                                                                      |
| number of pregnancies                                  | PARITY      | number of pregnancies       | 31                                        | 55             | Number of pregnancies lasting at least 6 months, computed from form 31, questions 7, 7.6, 7.7                                                                                                                                        |
| WHO fracture risk                                      | WHOFRACT    | risk score                  | n/a                                       | Risk scores 2  | Derived using the FRAX tool                                                                                                                                                                                                          |
| current smoking                                        | SMOKING     | True/False                  | 34                                        | 48             | Computed from Form 34, questions 1, 1.2, and 1.5. Selected current smoking (True/False).                                                                                                                                             |
| participated in menopausal hormone therapy (MHT) trial | HRTFLAG     | True/False                  | Demographics and Study Membership (CT+OS) | 4              | n/a                                                                                                                                                                                                                                  |
| hormone use ever                                       | TOTH        | True/False                  | 43                                        | 32             | HRT use ever, collected at baseline                                                                                                                                                                                                  |
| participated in calcium and vitamin D trial            | CADFLAG     | True/False                  | Demographics and Study Membership (CT+OS) | 4              | n/a                                                                                                                                                                                                                                  |
| bilateral oophorectomy                                 | BOOPH       | True/False                  | 31                                        | 60             | Computed from for 31, question 10.                                                                                                                                                                                                   |
| hysterectomy                                           | HYST        | True/False                  | 2                                         | 22             | From form 2, question 18.                                                                                                                                                                                                            |
| hypertension history                                   | HTNTRT      | True/False                  | 30                                        | 109            | Computed from Form 30, questions 7, 7.2, and 7.3. Three category variable on history of hypertension including information on current treatment. The three groups are never, currently untreated and currently treated hypertensive. |
| diabetes history                                       | DIABTRT     | True/False                  | 2                                         | 69             | Computed from Form 2, question 23, 23.4 and 23.6. Indicator for whether the participant has ever been treated for diabetes with pills or shots.                                                                                      |
| broken bone history                                    | BKBONE      | True/False                  | 30                                        | 92             | Self-reported at baseline from question 15                                                                                                                                                                                           |
| osteoporosis history                                   | OSTEOPOR    | True/False                  | 30                                        | 16             | Self-reported at baseline from question 2                                                                                                                                                                                            |
| stroke or TIA history                                  | STROKE, TIA | True/False                  | 2                                         | 43, 45         | Self-reported as having been diagnosed by a doctor from questions 26, 27.                                                                                                                                                            |

## Item 3b.

| Table. Definition of clinical outcomes in Women's Health Initiative data. |               |                                                                                  |                |                                                                                                                                                                                                                                                             |
|---------------------------------------------------------------------------|---------------|----------------------------------------------------------------------------------|----------------|-------------------------------------------------------------------------------------------------------------------------------------------------------------------------------------------------------------------------------------------------------------|
| Outcome                                                                   | Variable ID   | Form                                                                             | Variable Order | Description                                                                                                                                                                                                                                                 |
| Breast cancer                                                             | BREAST        | CT & OS<br>Adjudicated<br>Outcomes                                               | 97             | Defined as the first occurrence of Invasive or In Situ Breast Cancer. All Deaths due to breast cancer are considered Invasive Breast Cancers. Breast Cancer is adjudicated for CT and OS participants.                                                      |
| Endometrial cancer                                                        | ENDMTRL       | CT & OS<br>Adjudicated<br>Outcomes                                               | 124            | Defined as the first occurrence of Endometrial Cancer or a Death due to Endometrial Cancer. Endometrial Cancer is adjudicated for CT and OS participants.                                                                                                   |
| Ovarian cancer                                                            | OVARY         | CT & OS<br>Adjudicated<br>Outcomes                                               | 205            | Defined as the first occurrence of Ovarian Cancer or a Death due to Ovarian Cancer. Ovarian Cancer is adjudicated for CT and OS participants.                                                                                                               |
| Lung cancer                                                               | LUNG          | CT & OS<br>Adjudicated<br>Outcomes                                               | 160            | Defined as the first occurrence of Lung Cancer or a Death due to Lung Cancer. Lung Cancer is adjudicated for CT and OS participants.                                                                                                                        |
| Coronary heart disease                                                    | CHD           | CT & OS<br>Adjudicated<br>Outcomes                                               | 16             | Defined as the first occurrence of Clinical MI, Definite Silent MI or a Death due to Definite CHD or Possible CHD. Clinical MI and Death were adjudicated for CT and OS ppts through Ext1. In Ext2 they are only adjudicated for the Medical Record Cohort. |
| Ischemic stroke                                                           | STRKISCH      | CT & OS<br>Adjudicated<br>Outcomes                                               | 40             | Defined as a Stroke where the diagnosis question indicates an ischemic stroke. Ischemic Stroke was adjudicated for CT and OS participants through Ext1. In Ext2 it is only adjudicated for the Medical Record Cohort.                                       |
| Fracture                                                                  | ANYFX         | CT & OS<br>Adjudicated<br>Outcomes                                               | 280            | Defined as the first fracture of Hip, upper leg, pelvis, knee, lower leg, ankle, foot(not toe), tailbone, spine or back, lower arm or wrist, hand (not finger), elbow, upper arm or shoulder and other.                                                     |
| Osteoporosis                                                              | F33OSTEOP     | Self<br>Reported<br>Outcomes<br>for CT/OS<br>through WHI<br>Extension<br>Study 1 | 43             | Not collected after WHI study closeout.                                                                                                                                                                                                                     |
| Alzheimer disease                                                         | F33ALZHEIMERS | Self<br>Reported<br>Outcomes<br>for CT/OS<br>through WHI<br>Extension<br>Study 1 | 71             | Combined from all three instances (CT/OS extension 1, CaD extension 1, and extension 1)                                                                                                                                                                     |

## Item 3c.

| Table. Definition of covariates in the UK Biobank data. |                                                                              |                                     |                                                                                                                                                                                                                                                                                                                                                                                                                           |
|---------------------------------------------------------|------------------------------------------------------------------------------|-------------------------------------|---------------------------------------------------------------------------------------------------------------------------------------------------------------------------------------------------------------------------------------------------------------------------------------------------------------------------------------------------------------------------------------------------------------------------|
| Covariate                                               | Variable ID                                                                  | Units                               | Description                                                                                                                                                                                                                                                                                                                                                                                                               |
| age at menopause                                        | 3581                                                                         | years                               | Details given in text and supplement text                                                                                                                                                                                                                                                                                                                                                                                 |
| age at enrollment                                       | 21022                                                                        | years                               | Value provided as an integer                                                                                                                                                                                                                                                                                                                                                                                              |
| body mass index                                         | 21001                                                                        | kg/m <sup>2</sup>                   | Derived from measured height and weight at enrollment                                                                                                                                                                                                                                                                                                                                                                     |
| systolic blood pressure                                 | 4080                                                                         | mmHg                                | Measured at enrollment                                                                                                                                                                                                                                                                                                                                                                                                    |
| Townsend index (SES)                                    | 189                                                                          | n/a                                 | Numeric representation of material deprivation                                                                                                                                                                                                                                                                                                                                                                            |
| weekly alcohol                                          | 1558, 4462, 5364, 4429, 4418, 4451, 4407, 4440, 1588, 1578, 1608, 1568, 1598 | glasses of wine equivalent per week | Annual alcohol (g) was factored according to the list of all alcohol types typically consumed. This number was divided by 52 weeks and then converted into an equivalent number of glasses of wine.                                                                                                                                                                                                                       |
| serum vitamin D                                         | 30890                                                                        | nmol/L                              | Laboratory value from serum drawn at enrollment                                                                                                                                                                                                                                                                                                                                                                           |
| parity                                                  | 2734                                                                         | children                            | Number of live births                                                                                                                                                                                                                                                                                                                                                                                                     |
| current smoking                                         | 20116                                                                        | True/False                          | Self-reported                                                                                                                                                                                                                                                                                                                                                                                                             |
| takes menopausal hormone therapy (MHT)                  | 6153                                                                         | True/False                          | Self-reported                                                                                                                                                                                                                                                                                                                                                                                                             |
| bilateral oophorectomy                                  | 2834 (status), 3882 (age, if applicable)                                     | True/False                          | Details given in text and supplement text                                                                                                                                                                                                                                                                                                                                                                                 |
| hysterectomy                                            | 3591 (status), 2824 (age, if applicable)                                     | True/False                          | Details given in text and supplement text                                                                                                                                                                                                                                                                                                                                                                                 |
| hypertension history                                    | 131286, 53                                                                   | True/False                          | True if date of 131286 (ICD I10 diagnosis) <= date of enrollment in field 53                                                                                                                                                                                                                                                                                                                                              |
| type II diabetes history                                | 2443, 4041, 20002, 20003, 2976, 2986, 30750                                  | True/False                          | Candidates included participants who had self-reported diabetes diagnosed by doctor that was not gestational only, took diabetes medications, or had an HbA1C that exceeded 48 mmol/mol. Those who had ever received a type 1 diabetes diagnosis code, who were diagnosed before age 35, or who required insulin within one year were then excluded (as clearly type 1 diabetes or potentially miscoded type 1 diabetes). |
| stroke or TIA history                                   | 20002, 131366, 53                                                            | True/False                          | Self-reported condition code 1081, 1082, or 1583; or, date of 131366 (ICD I63 diagnosis) preceded date of enrollment in field 53                                                                                                                                                                                                                                                                                          |

## Item 3d.

| Table. Definition of outcomes in UK Biobank data. |                  |             |                        |                                                                 |                                       |
|---------------------------------------------------|------------------|-------------|------------------------|-----------------------------------------------------------------|---------------------------------------|
| Outcome                                           | ICD-10 codes     | ICD-9 codes | Procedure codes        | Variable ID number (or variable column name, for hospital data) | Description                           |
| Breast cancer                                     | C50              | 174         | n/a                    | 40006, 40013                                                    | Cancer registry                       |
| Endometrial cancer                                | C54.1            | 182         | n/a                    | 40006, 40013                                                    | Cancer registry                       |
| Ovarian cancer                                    | C56              | 183         | n/a                    | 40006, 40013                                                    | Cancer registry                       |
| Lung cancer                                       | C34              | 162         | n/a                    | 40006, 40013                                                    | Cancer registry                       |
| Coronary heart disease                            | I20.0*, I21, I22 | 410, 411    | K49, K50, K75, K40-K46 | 131298, 131300, diag_icd10*,diag_icd9*, oper4*                  | First occurrences, Hospital raw data* |
| Ischemic stroke                                   | I63              | 433, 434    | n/a                    | 131366, diag_icd10*,diag_icd9*, oper4*                          | First occurrences, Hospital raw data* |
| Fracture                                          | M80              | n/a         | n/a                    | 131962                                                          | First occurrences                     |
| Osteoporosis                                      | M80, M81         | n/a         | n/a                    | 131962, 131964                                                  | First occurrences                     |
| Alzheimer disease                                 | F00, G30         | n/a         | n/a                    | 130836, 131036                                                  | First occurrences                     |

Item 4

Table. Single nucleotide polymorphisms reported by Day et al. in Pubmed ID 26414677 used as instrumental variables in Mendelian Randomization in this study.

| Locus (Closest gene)        | SNP           | Chr | Position (GRCh37) | Weight | Non effect Allele | Effect Allele (EA) | EA freq in WHI | $\beta$ (SE) in WHI | F statistic in WHI | EA freq in UKB | $\beta$ (SE) in UKB | F statistic in UKB |
|-----------------------------|---------------|-----|-------------------|--------|-------------------|--------------------|----------------|---------------------|--------------------|----------------|---------------------|--------------------|
| <i>RHBDL2, MYCBP</i>        | rs4246511     | 1   | 39380385          | 0.22   | C                 | T                  | 0.31           | 0.14 (0.07)         | 4.32               | 0.3            | 0.22 (0.02)         | 97.97              |
| <i>RAD54L</i>               | rs12142240    | 1   | 46747301          | 0.13   | T                 | C                  | 0.3            | 0.04 (0.07)         | 0.46               | 0.31           | 0.15 (0.02)         | 47.41              |
| <i>STX6</i>                 | rs1411478     | 1   | 180962282         | 0.13   | A                 | G                  | 0.59           | 0.21 (0.06)         | 11.68              | 0.6            | 0.14 (0.02)         | 42.27              |
| <i>EXO1</i>                 | rs2236918     | 1   | 242017826         | 0.15   | C                 | G                  | 0.55           | 0.01 (0.06)         | 0.03               | 0.55           | 0.13 (0.02)         | 39.13              |
| <i>BRE, GTF3C2, EIFB4</i>   | rs704795      | 2   | 27716494          | 0.16   | A                 | G                  | 0.62           | 0.22 (0.06)         | 12.35              | 0.6            | 0.19 (0.02)         | 82.94              |
| <i>MSH6</i>                 | rs1800932     | 2   | 48018081          | 0.17   | A                 | G                  | 0.18           | 0.18 (0.08)         | 5.31               | 0.19           | 0.21 (0.03)         | 63.8               |
| <i>TLK1</i>                 | rs930036      | 2   | 171941018         | 0.19   | A                 | G                  | 0.62           | 0.11 (0.06)         | 3.05               | 0.62           | 0.17 (0.02)         | 66.84              |
| <i>PARL, POLR2H</i>         | rs16858210    | 3   | 183624010         | 0.14   | G                 | A                  | 0.26           | 0.16 (0.07)         | 5.62               | 0.24           | 0.14 (0.02)         | 34.32              |
| <i>HELQ, FAM175A</i>        | rs4693089     | 4   | 84373622          | 0.2    | A                 | G                  | 0.49           | 0.13 (0.06)         | 4.42               | 0.49           | 0.29 (0.02)         | 210.82             |
| <i>ASCL1, MLF1IP</i>        | rs6856693     | 4   | 185748806         | 0.16   | A                 | G                  | 0.43           | 0.22 (0.06)         | 12.45              | 0.42           | 0.23 (0.02)         | 120.39             |
| <i>PAPD7</i>                | rs427394      | 5   | 6745875           | 0.13   | G                 | A                  | 0.58           | 0.08 (0.06)         | 1.58               | 0.58           | 0.13 (0.02)         | 42.63              |
| <i>SH3PXD2B</i>             | rs11738223    | 5   | 171934492         | 0.12   | A                 | G                  | 0.32           | 0.21 (0.07)         | 10.46              | 0.33           | 0.08 (0.02)         | 12.79              |
| <i>UIMC1</i>                | rs2241584     | 5   | 175956177         | 0.14   | A                 | G                  | 0.62           | 0.21 (0.06)         | 11.22              | 0.61           | 0.17 (0.02)         | 62.94              |
| <i>UIMC1</i>                | rs365132      | 5   | 176378574         | 0.24   | G                 | T                  | 0.49           | 0.36 (0.06)         | 35.45              | 0.48           | 0.32 (0.02)         | 239.44             |
| <i>SYCP2L, MAK</i>          | rs6899676     | 6   | 10895260          | 0.23   | A                 | G                  | 0.2            | 0.23 (0.08)         | 9.16               | 0.2            | 0.28 (0.03)         | 121.07             |
| <i>SYCP2L, MAK</i>          | rs9393800     | 6   | 10951737          | 0.17   | G                 | A                  | 0.73           | 0.13 (0.07)         | 3.85               | 0.73           | 0.2 (0.02)          | 77.18              |
| <i>MSH5, HLA</i>            | rs2230365     | 6   | 31525448          | 0.17   | C                 | T                  | 0.15           | 0.33 (0.08)         | 15.59              | 0.14           | 0.17 (0.03)         | 33.93              |
| <i>MSH5, HLA</i>            | rs707938      | 6   | 31729359          | 0.17   | G                 | A                  | 0.68           | 0.28 (0.06)         | 18.79              | 0.68           | 0.18 (0.02)         | 64.71              |
| <i>REV3L</i>                | rs12196873    | 6   | 111598058         | 0.16   | A                 | C                  | 0.14           | 0.2 (0.09)          | 5.64               | 0.14           | 0.15 (0.03)         | 26.07              |
| <i>STAR</i>                 | rs2720044     | 8   | 37980587          | 0.29   | A                 | C                  | 0.14           | 0.16 (0.09)         | 3.33               | 0.16           | 0.27 (0.03)         | 98.66              |
| <i>CHD7</i>                 | rs10957156    | 8   | 61629401          | 0.14   | A                 | G                  | 0.23           | 0.15 (0.07)         | 4.27               | 0.25           | 0.13 (0.02)         | 29.68              |
| <i>APTX</i>                 | rs4879656     | 9   | 33012382          | 0.12   | A                 | C                  | 0.62           | 0.13 (0.06)         | 4.11               | 0.62           | 0.11 (0.02)         | 25.98              |
| <i>FBXO18</i>               | rs10905065    | 10  | 5769827           | 0.11   | A                 | G                  | 0.39           | 0.06 (0.06)         | 0.93               | 0.39           | 0.1 (0.02)          | 22.21              |
| <i>FSHB</i>                 | rs11031006    | 11  | 30226528          | 0.22   | G                 | A                  | 0.14           | 0.25 (0.09)         | 8.17               | 0.15           | 0.19 (0.03)         | 44.73              |
| <i>LOC105376607</i>         | rs6484478* ** | 11  | 30306440          | 0.1    | G                 | A                  | 0.21           | -0.1 (0.07)         | 1.92               | 0.23           | -0.01 (0.02)        | 0.16               |
| <i>EIF3M</i>                | rs10734411    | 11  | 32541784          | 0.12   | A                 | G                  | 0.52           | 0.03 (0.06)         | 0.31               | 0.52           | 0.13 (0.02)         | 39.64              |
| <i>PRIM1, TAC3</i>          | rs2277339     | 12  | 57146069          | 0.31   | G                 | T                  | 0.89           | 0.23 (0.1)          | 5.13               | 0.89           | 0.4 (0.03)          | 147.1              |
| <i>HELB</i>                 | rs3741604     | 12  | 66696410          | 0.09   | T                 | C                  | 0.45           | 0.05 (0.06)         | 0.74               | 0.47           | 0.1 (0.02)          | 24.14              |
| <i>HELB</i>                 | rs75770066    | 12  | 66704225          | 0.85   | A                 | G                  | 0.03           | 0.87 (0.21)         | 16.64              | 0.03           | 1.05 (0.06)         | 321.35             |
| <i>HELB</i>                 | rs1183272     | 12  | 66735421          | 0.07   | C                 | T                  | 0.58           | 0.17 (0.06)         | 7.39               | 0.55           | 0.11 (0.02)         | 28.69              |
| <i>HELB</i>                 | rs7397861*    | 12  | 66814466          | 0.1    | G                 | C                  | 0.36           | 0 (0.06)            | 0                  | 0.37           | 0.07 (0.02)         | 12.4               |
| <i>SPPL3, SRSF9</i>         | rs551087**    | 12  | 121209193         | 0.13   | G                 | A                  | 0.7            | 0.06 (0.07)         | 0.72               | 0.71           | -0.01 (0.02)        | 0.23               |
| <i>MPHOSPH9</i>             | rs1727326     | 12  | 123600086         | 0.19   | C                 | G                  | 0.86           | 0.01 (0.1)          | 0.01               | 0.86           | 0.17 (0.03)         | 31.61              |
| <i>PIWIL1</i>               | rs12824058    | 12  | 130804334         | 0.14   | G                 | A                  | 0.58           | 0.01 (0.06)         | 0.01               | 0.58           | 0.12 (0.02)         | 35.81              |
| <i>TDRD3</i>                | rs4886238     | 13  | 61113739          | 0.18   | G                 | A                  | 0.33           | 0.31 (0.06)         | 23.75              | 0.33           | 0.2 (0.02)          | 86.62              |
| <i>APEX1, PARP2, PNP</i>    | rs1713460     | 14  | 20933615          | 0.14   | G                 | A                  | 0.7            | 0.2 (0.07)          | 9.15               | 0.69           | 0.15 (0.02)         | 48.63              |
| <i>INO80, RAD51</i>         | rs9796        | 15  | 41271447          | 0.13   | T                 | A                  | 0.54           | 0.14 (0.06)         | 4.89               | 0.53           | 0.17 (0.02)         | 71.01              |
| <i>POLG, FANCI</i>          | rs1054875     | 15  | 89879126          | 0.19   | T                 | A                  | 0.58           | 0.02 (0.06)         | 0.11               | 0.61           | 0.18 (0.02)         | 78.23              |
| <i>C16orf72, ABAT</i>       | rs9039        | 16  | 9205363           | 0.12   | C                 | T                  | 0.71           | 0.08 (0.07)         | 1.48               | 0.73           | 0.13 (0.02)         | 29.87              |
| <i>GSP11, BCAR4</i>         | rs10852344    | 16  | 12016919          | 0.16   | T                 | C                  | 0.42           | 0.14 (0.06)         | 5.32               | 0.4            | 0.25 (0.02)         | 147.01             |
| <i>UBE2MP1</i>              | rs12599106    | 16  | 34498025          | 0.12   | A                 | T                  | 0.48           | 0.14 (0.06)         | 4.68               | 0.5            | 0.13 (0.02)         | 39.22              |
| <i>RPAIN</i>                | rs8070740     | 17  | 5331896           | 0.15   | A                 | G                  | 0.25           | 0.09 (0.07)         | 1.7                | 0.24           | 0.15 (0.02)         | 38.01              |
| <i>STARD3, PGAP3, CDK12</i> | rs2941505     | 17  | 37832704          | 0.13   | A                 | G                  | 0.66           | 0.12 (0.06)         | 3.61               | 0.69           | 0.16 (0.02)         | 54.33              |
| <i>BRCA1</i>                | rs1799949     | 17  | 41245466          | 0.14   | G                 | A                  | 0.33           | 0.14 (0.06)         | 4.57               | 0.32           | 0.23 (0.02)         | 109.02             |
| <i>ARID3A</i>               | rs349306#     | 19  | 950694            | 0.23   | G                 | A                  | 0.87           | 0.17 (0.1)          | 2.74               | 0.87           | 0.24 (0.03)         | 61.17              |
| <i>ZNF729</i>               | rs7259376     | 19  | 22507705          | 0.11   | A                 | G                  | 0.55           | 0.24 (0.06)         | 15.5               | 0.53           | 0.11 (0.02)         | 30.08              |
| <i>BRSK1, NLRP11, U2AF2</i> | rs11668344    | 19  | 55833664          | 0.41   | G                 | A                  | 0.64           | 0.43 (0.06)         | 46.77              | 0.63           | 0.49 (0.02)         | 534.83             |
| <i>BRSK1, NLRP11, U2AF2</i> | rs2547274     | 19  | 56310228          | 0.28   | G                 | C                  | 0.09           | 0.27 (0.1)          | 6.57               | 0.09           | 0.24 (0.04)         | 44.53              |
| <i>BRSK1, NLRP11, U2AF2</i> | rs12461110    | 19  | 56320663          | 0.17   | A                 | G                  | 0.65           | 0.26 (0.06)         | 16.32              | 0.63           | 0.17 (0.02)         | 67.43              |
| <i>MCM8</i>                 | rs451417      | 20  | 5941999           | 0.2    | A                 | C                  | 0.88           | 0.05 (0.09)         | 0.31               | 0.88           | 0.25 (0.03)         | 66.81              |
| <i>MCM8</i>                 | rs16991615    | 20  | 5948227           | 0.88   | G                 | A                  | 0.06           | 0.85 (0.13)         | 43.11              | 0.06           | 1.06 (0.04)         | 623.76             |
| <i>SLCO4A1</i>              | rs2236553#    | 20  | 61289743          | 0.16   | C                 | T                  | 0.75           | 0.07 (0.08)         | 0.78               | 0.75           | 0.22 (0.02)         | 81.7               |
| <i>DIDO1</i>                | rs13040088#   | 20  | 61549202          | 0.16   | G                 | A                  | 0.8            | 0.2 (0.08)          | 6.53               | 0.79           | 0.17 (0.02)         | 46.8               |
| <i>CHEK2</i>                | rs5762534     | 22  | 28633571          | 0.16   | T                 | C                  | 0.15           | 0.22 (0.08)         | 7.19               | 0.15           | 0.13 (0.03)         | 20.3               |
| <i>DMC1, DDX17</i>          | rs763121      | 22  | 38879940          | 0.16   | G                 | A                  | 0.65           | 0.06 (0.06)         | 0.92               | 0.66           | 0.17 (0.02)         | 63.63              |

SNP = single nucleotide polymorphism; Chr = chromosome number; SE = standard error; WHI = Women's Health Initiative; UKB = UK Biobank. \* indicates SNPs with an inconsistent direction of effect between Day and WHI, # indicates 3 SNPs that failed imputation on ~10% samples in WHI, \*\* indicates SNPs with an inconsistent direction of effect between Day and UKB. These SNPs were excluded from further analysis.



## Supplemental Results

### Item 5

| Table. Observational association results in tabular form |                   |       |        |
|----------------------------------------------------------|-------------------|-------|--------|
| Outcome and dataset                                      | OR [95% CI]       | Cases | Total  |
| <b>Breast cancer</b>                                     |                   |       |        |
| WHI                                                      | 1.06 [1.03, 1.08] | 8087  | 97703  |
| UKB                                                      | 1.15 [1.11, 1.19] | 3192  | 91205  |
| WHI + UKB summary                                        | 1.10 [1.01, 1.19] | 11279 | 188908 |
| <b>Endometrial cancer</b>                                |                   |       |        |
| WHI                                                      | 1.20 [1.12, 1.27] | 1322  | 69553  |
| UKB                                                      | 1.37 [1.27, 1.48] | 748   | 95151  |
| WHI + UKB summary                                        | 1.28 [1.12, 1.46] | 2070  | 164704 |
| <b>Ovarian cancer</b>                                    |                   |       |        |
| WHI                                                      | 1.07 [1.00, 1.13] | 899   | 92111  |
| UKB                                                      | 1.03 [0.94, 1.12] | 419   | 95304  |
| WHI + UKB summary                                        | 1.05 [1.00, 1.11] | 1318  | 187415 |
| <b>Lung cancer</b>                                       |                   |       |        |
| WHI                                                      | 0.92 [0.89, 0.96] | 2509  | 98113  |
| UKB                                                      | 0.85 [0.81, 0.90] | 815   | 95390  |
| WHI + UKB summary                                        | 0.89 [0.83, 0.96] | 3324  | 193503 |
| <b>Coronary heart disease</b>                            |                   |       |        |
| WHI                                                      | 0.97 [0.95, 0.99] | 4583  | 94024  |
| UKB                                                      | 0.95 [0.91, 0.99] | 1798  | 94074  |
| WHI + UKB summary                                        | 0.97 [0.95, 0.98] | 6381  | 188098 |
| <b>Ischemic stroke</b>                                   |                   |       |        |
| WHI                                                      | 0.96 [0.93, 0.99] | 2726  | 96969  |
| UKB                                                      | 0.92 [0.87, 0.96] | 1171  | 95273  |
| WHI + UKB summary                                        | 0.94 [0.90, 0.99] | 3897  | 192242 |
| <b>Fracture</b>                                          |                   |       |        |
| WHI                                                      | 0.96 [0.94, 0.99] | 8055  | 98112  |
| UKB                                                      | 0.87 [0.80, 0.94] | 481   | 95258  |
| WHI + UKB summary                                        | 0.92 [0.83, 1.02] | 8536  | 193370 |
| <b>Osteoporosis</b>                                      |                   |       |        |
| WHI                                                      | 0.95 [0.93, 0.96] | 25477 | 97726  |
| UKB                                                      | 0.84 [0.82, 0.87] | 4962  | 91547  |
| WHI + UKB summary                                        | 0.89 [0.80, 1.00] | 30439 | 189273 |
| <b>Alzheimer disease</b>                                 |                   |       |        |
| WHI                                                      | 0.94 [0.91, 0.97] | 3611  | 73798  |
| UKB                                                      | 0.89 [0.83, 0.95] | 611   | 95462  |
| WHI + UKB summary                                        | 0.92 [0.88, 0.97] | 4222  | 169260 |

Item 6

Associations of ANM and confounders with instrument variables. ANM: Age of natural menopause, BMI: body mass index, MHT: menopausal hormone therapy, SBP: systolic blood pressure, TIA: trans ischemic attack, UKB: UK Biobank, WHI: Women’s Health Initiative, WHO: World Health Organization,

**Supplementary Figure a for Item 6.**

**Association of instrument variable with exposure variable and continuous confounders**

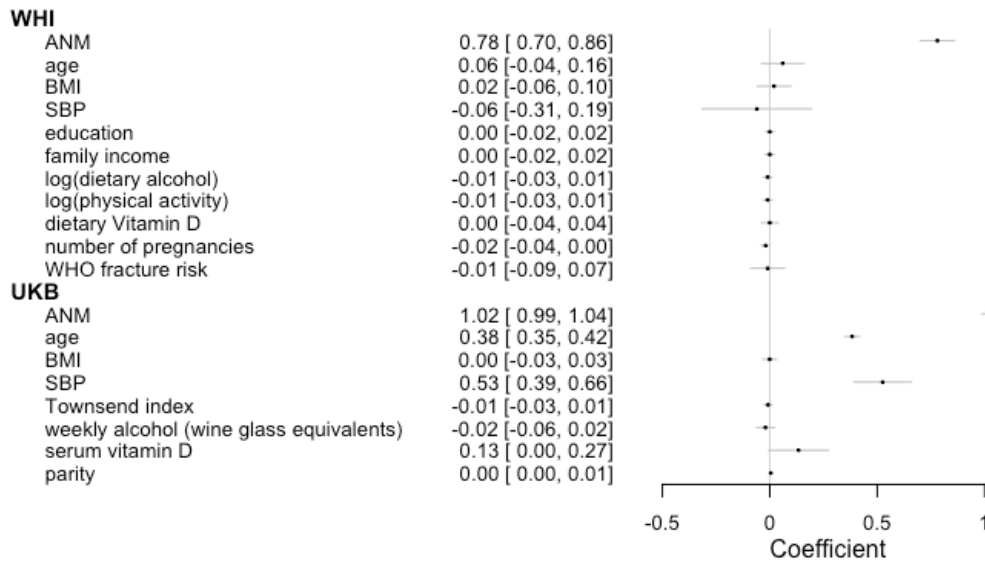

**Supplementary Figure b for Item 6.**

**Association of instrument variable with binary confounders**

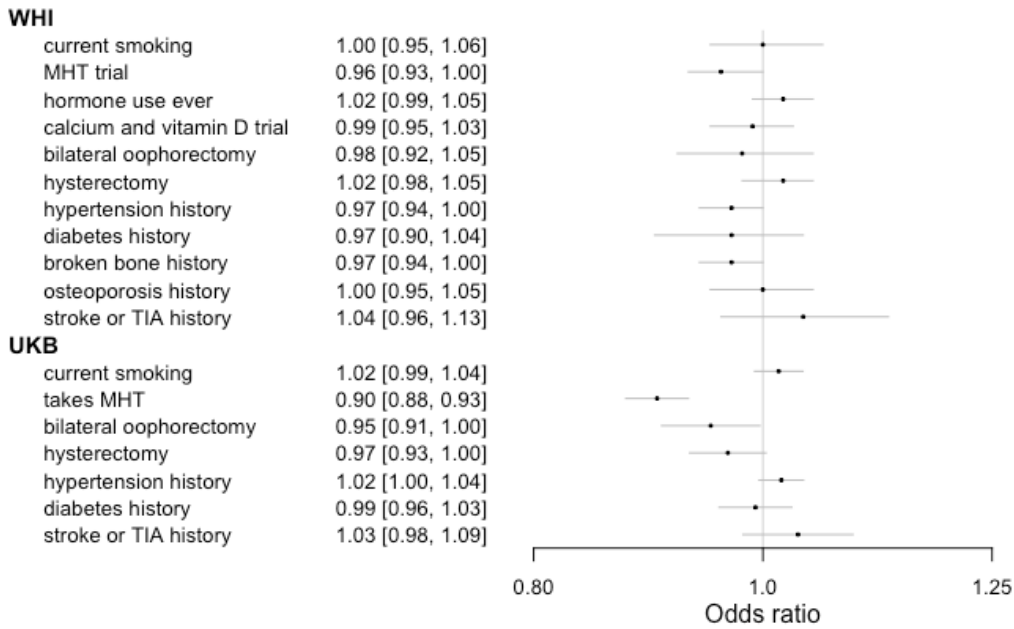

## Item 7.

| Table. Mendelian Randomization association results in tabular form |                    |       |        |
|--------------------------------------------------------------------|--------------------|-------|--------|
| Outcome and datasets                                               | OR [95% CI]        | Cases | Total  |
| <b>Breast cancer</b>                                               |                    |       |        |
| WHI                                                                | 1.82 [1.50, 2.21]  | 3967  | 17906  |
| UKB                                                                | 0.98 [0.82, 1.17]  | 3192  | 91205  |
| NHS                                                                | 1.59 [0.97, 2.60]  | 1089  | 2182   |
| WHI + UKB summary                                                  | 1.33 [0.73, 2.44]  | 7159  | 109111 |
| Summary for all data                                               | 1.40 [0.88, 2.24]  | 8248  | 111293 |
| <b>Endometrial cancer</b>                                          |                    |       |        |
| WHI                                                                | 2.37 [1.23, 4.57]  | 208   | 13200  |
| UKB                                                                | 1.37 [0.96, 1.96]  | 748   | 95151  |
| E2C2                                                               | 0.89 [0.58, 1.34]  | 1830  | 3441   |
| WHI + UKB summary                                                  | 1.68 [1.00, 2.82]  | 956   | 108351 |
| Summary for all data                                               | 1.35 [0.83, 2.18]  | 2786  | 111792 |
| <b>Ovarian cancer</b>                                              |                    |       |        |
| WHI                                                                | 1.19 [0.47, 3.00]  | 134   | 17059  |
| UKB                                                                | 1.39 [0.85, 2.27]  | 419   | 95304  |
| Summary for all data                                               | 1.35 [0.87, 2.07]  | 553   | 112363 |
| <b>Lung cancer</b>                                                 |                    |       |        |
| WHI                                                                | 1.52 [0.96, 2.41]  | 558   | 17981  |
| UKB                                                                | 1.34 [0.94, 1.89]  | 815   | 95390  |
| EAGLE+ATBC+PLCO+CSP-II GWAS                                        | 0.89 [0.47, 1.68]  | 835   | 1285   |
| NCI GWAS                                                           | 1.93 [0.83, 4.48]  | 498   | 986    |
| High density SNP analysis                                          | 1.35 [0.51, 3.55]  | 369   | 741    |
| WHI + UKB summary                                                  | 1.40 [1.06, 1.85]  | 1373  | 113371 |
| Summary for all data                                               | 1.35 [1.06, 1.71]  | 3075  | 116383 |
| <b>Coronary heart disease</b>                                      |                    |       |        |
| WHI                                                                | 0.83 [0.61, 1.13]  | 1348  | 17357  |
| UKB                                                                | 0.94 [0.74, 1.19]  | 1798  | 94074  |
| CHS                                                                | 1.25 [0.68, 2.31]  | 468   | 1902   |
| ARIC                                                               | 1.04 [0.57, 1.86]  | 495   | 4872   |
| FHS                                                                | 0.55 [0.16, 1.84]  | 118   | 1294   |
| MESA                                                               | 2.15 [0.42, 10.90] | 66    | 1089   |
| WHI + UKB summary                                                  | 0.90 [0.74, 1.08]  | 3146  | 111431 |
| Summary for all data                                               | 0.93 [0.79, 1.10]  | 4293  | 120588 |
| <b>Ischemic stroke</b>                                             |                    |       |        |
| WHI                                                                | 0.58 [0.40, 0.86]  | 830   | 17723  |
| UKB                                                                | 1.27 [0.94, 1.70]  | 1171  | 95273  |
| CHS                                                                | 1.28 [0.55, 2.96]  | 220   | 1925   |
| ARIC                                                               | 0.63 [0.24, 1.68]  | 157   | 4878   |
| WTCCC2                                                             | 0.66 [0.29, 1.49]  | 1593  | 3193   |
| FHS                                                                | 0.69 [0.10, 4.61]  | 45    | 1303   |
| MESA                                                               | 1.02 [0.08, 13.25] | 32    | 1089   |
| WHI + UKB summary                                                  | 0.87 [0.41, 1.86]  | 2001  | 112996 |
| Summary for all data                                               | 0.85 [0.58, 1.25]  | 4048  | 125384 |
| <b>Fracture</b>                                                    |                    |       |        |
| WHI                                                                | 0.72 [0.58, 0.89]  | 3310  | 17981  |
| UKB                                                                | 0.94 [0.60, 1.48]  | 481   | 95258  |
| Summary for all data                                               | 0.76 [0.62, 0.94]  | 3791  | 113239 |
| <b>Osteoporosis</b>                                                |                    |       |        |
| WHI                                                                | 0.95 [0.79, 1.14]  | 4965  | 17960  |
| UKB                                                                | 0.74 [0.64, 0.86]  | 4962  | 91547  |
| Kaiser                                                             | 0.76 [0.63, 0.92]  | 5147  | 27573  |
| WHI + UKB summary                                                  | 0.84 [0.66, 1.06]  | 9927  | 109507 |
| Summary for all data                                               | 0.81 [0.69, 0.94]  | 15074 | 137080 |
| <b>Alzheimer disease</b>                                           |                    |       |        |
| WHI                                                                | 1.06 [0.73, 1.54]  | 933   | 14740  |
| UKB                                                                | 0.97 [0.65, 1.45]  | 611   | 95462  |
| Summary for all data                                               | 1.02 [0.77, 1.34]  | 1544  | 110202 |

Item 8.

Plot of multivariable MR results vs. univariable MR results in the UK Biobank

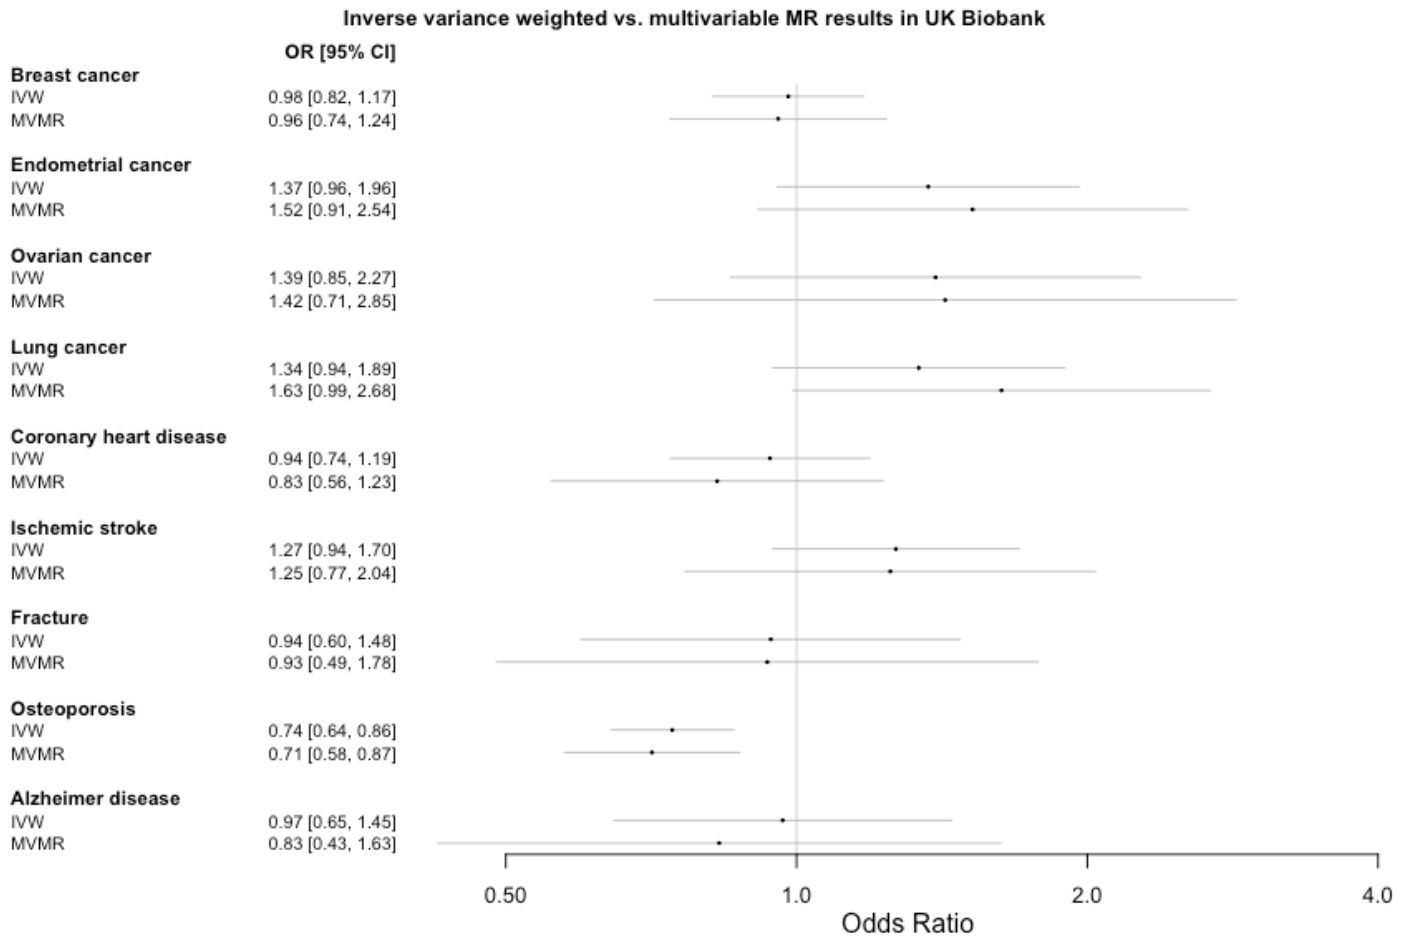

Supplement: Supplementary file [file media-1.pdf]
